# Supplementary material for: Thermally stable polysulfone nanofiltration/reverse osmosis membranes via amino grafting
Source: Royal Society of Chemistry journal article supplement (doi:10.1039/d5ta09156j), 2026-01-01
Supplement: d5ta09156j1.pdf [file d5ta09156j1.pdf]

## Supporting information

# Thermally Stable Polysulfone Nanofiltration/Reverse Osmosis Membranes via Amino Grafting

Ze-Min Hou<sup>a</sup>, Hao Tang<sup>b#</sup>, Hasan Ali Hayder<sup>a#</sup>, Dai-Feng Song<sup>c#</sup>, Min Li<sup>a#</sup>, Hao-Ran Zuo<sup>a\*</sup>, and Ming Duan<sup>a\*\*</sup>

---

<sup>a</sup> Oil and Gas Applied Chemistry Key Laboratory of Sichuan Province, School of Chemistry and Chemical Engineering, Southwest Petroleum University, Chengdu 610500, China

Email: [hrzuo@swpu.edu.cn](mailto:hrzuo@swpu.edu.cn) (Hao-Ran Zuo), [mduan@swpu.edu.cn](mailto:mduan@swpu.edu.cn) (Ming Duan).

<sup>b</sup> School of Materials and Chemical Engineering, Ningbo University of Technology, Ningbo, 315211, China

E-mail: [tanghao@nbut.edu.cn](mailto:tanghao@nbut.edu.cn)

<sup>c</sup> Chengdu Meifute Environmental Industry Group Co., Ltd.

Email: [mft@mft-cn.com](mailto:mft@mft-cn.com)

\* Corresponding author

\*\* Corresponding author

# These authors contributed equally to this work and should be considered co-first authors.

## S1 Surface density of amino group

The surface amination reaction was carried out following a nucleophilic substitution mechanism<sup>1</sup>. The dye adsorption method was used to measure the surface density of amino group ( $-\text{NH}_2$ ) on substrates prepared under different amination conditions<sup>2</sup>. In detail, a substrate sample ( $3 \times 3 \text{ cm}^2$ ) was immersed into an aqueous solution of acid orange 7 ( $500 \mu\text{mol/L}$ ,  $\text{pH}=3$ ) at  $25^\circ\text{C}$  for 24 h to ensure adequate adsorption. The dissociative acid orange 7 was removed by thoroughly washing with  $\text{HCl}$  solution at  $\text{pH}=3$ . The adsorbed acid orange 7 was desorbed in  $\text{NaOH}$  solution at  $\text{pH}=12$  at  $25^\circ\text{C}$  for 24 h. The absorbance of acid orange 7 in elution was measured by UV spectrophotometer (UV-1800, Shimadzu, Shanghai, China) and the concentration of acid orange 7 was calculated from standard curve illustrated in Figure S1 and Eq.\\* MERGEFORMAT (1). The surface density of amino group ( $C_{\text{NH}_2}$ ) was determined by Eq.\\* MERGEFORMAT (2),

$$y = 0.0096x \quad \text{\* MERGEFORMAT (1)}$$

$$C_{\text{NH}_2} = \frac{C_{\text{dye}} \times V_{\text{elution}}}{A} \quad \text{\* MERGEFORMAT (2)}$$

where  $C_{\text{dye}}$  is the concentration of acid orange 7 in the elution,  $V_{\text{elution}}$  is the volume of elution, and  $A$  is the surface area of the substrate sample.

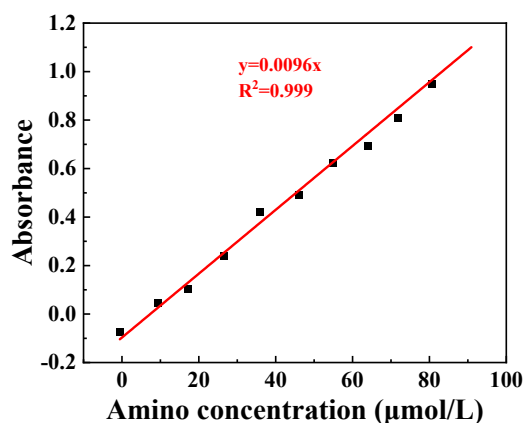

Figure S1 Standard curve of acid orange 7.

## S2 Pore Size of Membranes Under Different Amination Conditions

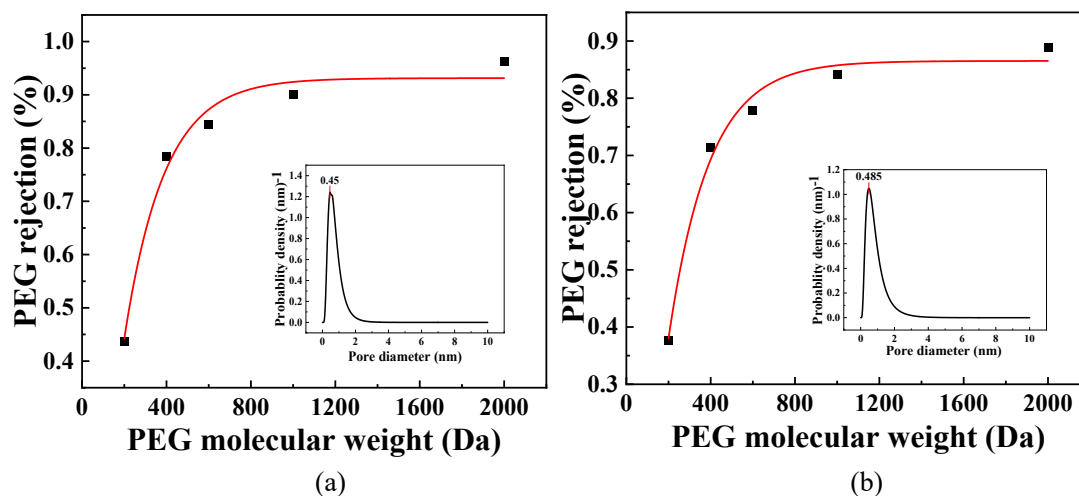

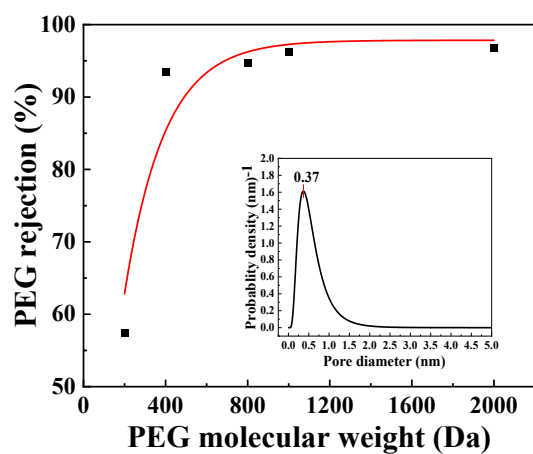

(c)

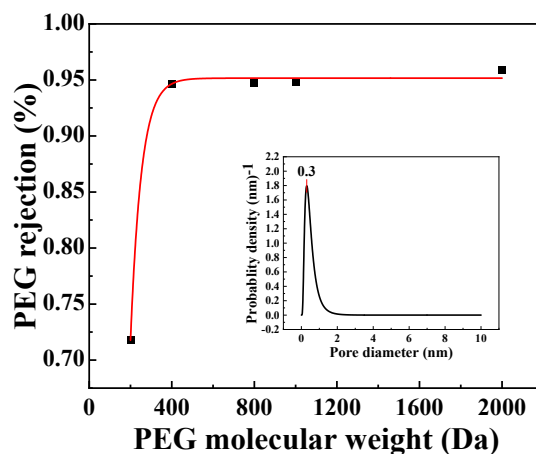

(d)

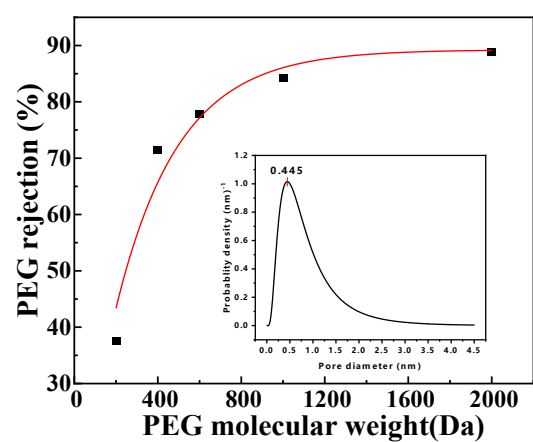

(e)

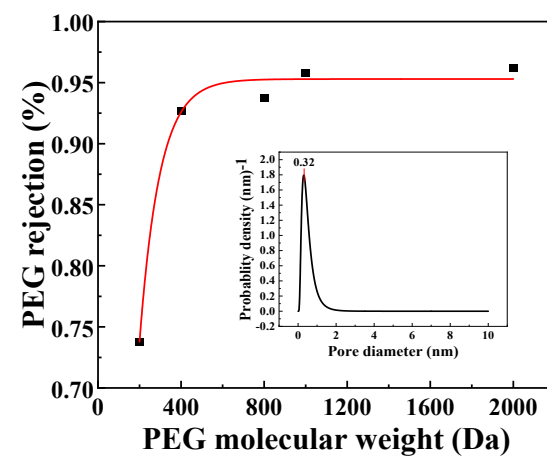

(f)

**Figure S2** Pore Size of Membranes Under Different Amination Conditions. (a-c): The amination time was set at 24 h, with DETA concentrations of 20 wt.%, 30 wt.%, and 40 wt.% respectively, (d-e): The DETA concentration was fixed at 25 wt.%, while the amination time was set at 12 h, 24 h, and 36 h respectively.

## References

1. L. Wang, Y. Cui, N. Wang, H. Zhang, B. Zhu, L. Zhu and Y. Xu, *Polymer Degradation and Stability*, 2014, 103, 69-74.
2. V. Hoseinpour, A. Ghaee, V. Vatanpour and N. Ghaemi, *Carbohydrate Polymers*, 2018, 188, 37-47.
